# Supplementary material
Source: publisher site journal article supplement (https://www.kjim.org/upload/media/kjim-2025-171-Supplementary-Table-9.pdf)
Supplement: Supplementary file 1 [file kjim-2025-171-Supplementary-Table-9.pdf]

**Supplementary Table 9. Stratification analysis of the incident risk of chronic hepatitis following zoster vaccination in the propensity score-matched cohort**

| Chronic hepatitis                    | Events, n (%) | Incidence rate <sup>b)</sup> | aHR (95% CI)                      |                                   |
|--------------------------------------|---------------|------------------------------|-----------------------------------|-----------------------------------|
|                                      |               |                              | Model 1 <sup>c)</sup>             | Model 2 <sup>d)</sup>             |
| Sex                                  |               |                              |                                   |                                   |
| Male                                 |               |                              |                                   |                                   |
| Unvaccinated                         | 10,889 (3.43) | 2.71                         | 1.0 (reference)                   | 1.0 (reference)                   |
| Vaccinated                           | 8,191 (2.54)  | 2.25                         | 0.80 (0.77 to 0.82) <sup>e)</sup> | 0.79 (0.76 to 0.81) <sup>e)</sup> |
| Female                               |               |                              |                                   |                                   |
| Unvaccinated                         | 12,876 (3.12) | 3.20                         | 1.0 (reference)                   | 1.0 (reference)                   |
| Vaccinated                           | 10,408 (2.54) | 2.86                         | 0.84 (0.82 to 0.86) <sup>e)</sup> | 0.84 (0.81 to 0.86) <sup>e)</sup> |
| Age (yr)                             |               |                              |                                   |                                   |
| < 60                                 |               |                              |                                   |                                   |
| Unvaccinated                         | 9,030 (4.64)  | 2.25                         | 1.0 (reference)                   | 1.0 (reference)                   |
| Vaccinated                           | 6,876 (3.50)  | 1.89                         | 0.78 (0.75 to 0.80) <sup>e)</sup> | 0.77 (0.74 to 0.79) <sup>e)</sup> |
| ≥ 60                                 |               |                              |                                   |                                   |
| Unvaccinated                         | 14,735 (2.75) | 3.66                         | 1.0 (reference)                   | 1.0 (reference)                   |
| Vaccinated                           | 11,723 (2.19) | 3.22                         | 0.85 (0.83 to 0.87) <sup>e)</sup> | 0.84 (0.82 to 0.86) <sup>e)</sup> |
| Region of residence                  |               |                              |                                   |                                   |
| Urban                                |               |                              |                                   |                                   |
| Unvaccinated                         | 11,044 (3.25) | 2.75                         | 1.0 (reference)                   | 1.0 (reference)                   |
| Vaccinated                           | 8,589 (2.53)  | 2.36                         | 0.81 (0.79 to 0.83) <sup>e)</sup> | 0.80 (0.78 to 0.82) <sup>e)</sup> |
| Rural                                |               |                              |                                   |                                   |
| Unvaccinated                         | 12,721 (3.25) | 3.16                         | 1.0 (reference)                   | 1.0 (reference)                   |
| Vaccinated                           | 10,010 (2.55) | 2.75                         | 0.83 (0.81 to 0.85) <sup>e)</sup> | 0.83 (0.80 to 0.85) <sup>e)</sup> |
| Household income                     |               |                              |                                   |                                   |
| Low (0th–39th percentile)            |               |                              |                                   |                                   |
| Unvaccinated                         | 7,346 (3.48)  | 1.83                         | 1.0 (reference)                   | 1.0 (reference)                   |
| Vaccinated                           | 5,483 (2.61)  | 1.51                         | 0.79 (0.76 to 0.82) <sup>e)</sup> | 0.78 (0.76 to 0.81) <sup>e)</sup> |
| Middle (40th–79th percentile)        |               |                              |                                   |                                   |
| Unvaccinated                         | 8,727 (3.30)  | 2.17                         | 1.0 (reference)                   | 1.0 (reference)                   |
| Vaccinated                           | 6,701 (2.56)  | 1.84                         | 0.82 (0.80 to 0.85) <sup>e)</sup> | 0.81 (0.79 to 0.84) <sup>e)</sup> |
| High (80th–100th percentile)         |               |                              |                                   |                                   |
| Unvaccinated                         | 7,692 (3.01)  | 1.91                         | 1.0 (reference)                   | 1.0 (reference)                   |
| Vaccinated                           | 6,415 (2.48)  | 1.76                         | 0.85 (0.82 to 0.88) <sup>e)</sup> | 0.84 (0.82 to 0.87) <sup>e)</sup> |
| Body mass index (kg/m <sup>2</sup> ) |               |                              |                                   |                                   |
| < 23.0                               |               |                              |                                   |                                   |
| Unvaccinated                         | 5,265 (2.75)  | 1.31                         | 1.0 (reference)                   | 1.0 (reference)                   |
| Vaccinated                           | 4,235 (2.21)  | 1.16                         | 0.84 (0.81 to 0.88) <sup>e)</sup> | 0.83 (0.80 to 0.87) <sup>e)</sup> |
| 23.0–24.9                            |               |                              |                                   |                                   |
| Unvaccinated                         | 6,173 (3.08)  | 1.54                         | 1.0 (reference)                   | 1.0 (reference)                   |
| Vaccinated                           | 4,675 (1.17)  | 1.28                         | 0.80 (0.77 to 0.83) <sup>e)</sup> | 0.80 (0.77 to 0.83) <sup>e)</sup> |
| ≥ 25.0                               |               |                              |                                   |                                   |
| Unvaccinated                         | 12,327 (3.63) | 3.07                         | 1.0 (reference)                   | 1.0 (reference)                   |
| Vaccinated                           | 9,689 (2.94)  | 2.66                         | 0.82 (0.80 to 0.84) <sup>e)</sup> | 0.81 (0.79 to 0.84) <sup>e)</sup> |

Supplementary Table 9. Continued

| Chronic hepatitis                          | Events, n (%) | Incidence rate <sup>b)</sup> | aHR (95% CI)                      |                                   |
|--------------------------------------------|---------------|------------------------------|-----------------------------------|-----------------------------------|
|                                            |               |                              | Model 1 <sup>c)</sup>             | Model 2 <sup>d)</sup>             |
| Smoking status <sup>a)</sup>               |               |                              |                                   |                                   |
| Non-smoker                                 |               |                              |                                   |                                   |
| Unvaccinated                               | 15,991 (3.16) | 3.98                         | 1.0 (reference)                   | 1.0 (reference)                   |
| Vaccinated                                 | 12,621 (2.52) | 3.47                         | 0.83 (0.81 to 0.85) <sup>e)</sup> | 0.82 (0.81 to 0.84) <sup>e)</sup> |
| Smoker                                     |               |                              |                                   |                                   |
| Unvaccinated                               | 7,774 (3.44)  | 1.93                         | 1.0 (reference)                   | 1.0 (reference)                   |
| Vaccinated                                 | 5,987 (2.60)  | 1.65                         | 0.80 (0.78 to 0.83) <sup>e)</sup> | 0.79 (0.77 to 0.82) <sup>e)</sup> |
| Alcohol consumption (day per week)         |               |                              |                                   |                                   |
| < 1                                        |               |                              |                                   |                                   |
| Unvaccinated                               | 10,261 (2.53) | 2.55                         | 1.0 (reference)                   | 1.0 (reference)                   |
| Vaccinated                                 | 7,352 (1.82)  | 2.02                         | 0.76 (0.74 to 0.78) <sup>e)</sup> | 0.76 (0.73 to 0.78) <sup>e)</sup> |
| 1–4                                        |               |                              |                                   |                                   |
| Unvaccinated                               | 12,860 (4.11) | 3.20                         | 1.0 (reference)                   | 1.0 (reference)                   |
| Vaccinated                                 | 10,745 (3.42) | 2.95                         | 0.86 (0.84 to 0.89) <sup>e)</sup> | 0.86 (0.84 to 0.88) <sup>e)</sup> |
| ≥ 5                                        |               |                              |                                   |                                   |
| Unvaccinated                               | 644 (5.34)    | 0.16                         | 1.0 (reference)                   | 1.0 (reference)                   |
| Vaccinated                                 | 502 (3.80)    | 0.14                         | 0.76 (0.68 to 0.85) <sup>e)</sup> | 0.75 (0.67 to 0.85) <sup>e)</sup> |
| Physical activity                          |               |                              |                                   |                                   |
| Insufficient physical activity             |               |                              |                                   |                                   |
| Unvaccinated                               | 18,467 (3.29) | 4.59                         | 1.0 (reference)                   | 1.0 (reference)                   |
| Vaccinated                                 | 14,263 (2.57) | 3.92                         | 0.82 (0.80 to 0.84) <sup>e)</sup> | 0.81 (0.79 to 0.83) <sup>e)</sup> |
| Sufficient physical activity               |               |                              |                                   |                                   |
| Unvaccinated                               | 5,298 (3.11)  | 1.32                         | 1.0 (reference)                   | 1.0 (reference)                   |
| Vaccinated                                 | 4,336 (2.47)  | 1.19                         | 0.84 (0.80 to 0.87) <sup>e)</sup> | 0.83 (0.79 to 0.86) <sup>e)</sup> |
| Medication use for coronary artery disease |               |                              |                                   |                                   |
| No                                         |               |                              |                                   |                                   |
| Unvaccinated                               | 22,875 (3.25) | 5.69                         | 1.0 (reference)                   | 1.0 (reference)                   |
| Vaccinated                                 | 17,891 (2.54) | 4.92                         | 0.82 (0.80 to 0.84) <sup>e)</sup> | 0.81 (0.80 to 0.83) <sup>e)</sup> |
| Yes                                        |               |                              |                                   |                                   |
| Unvaccinated                               | 890 (3.40)    | 0.22                         | 1.0 (reference)                   | 1.0 (reference)                   |
| Vaccinated                                 | 708 (2.74)    | 0.19                         | 0.84 (0.76 to 0.93) <sup>e)</sup> | 0.84 (0.76 to 0.93) <sup>e)</sup> |
| Medication use for hypertension            |               |                              |                                   |                                   |
| No                                         |               |                              |                                   |                                   |
| Unvaccinated                               | 15,336 (3.15) | 3.81                         | 1.0 (reference)                   | 1.0 (reference)                   |
| Vaccinated                                 | 11,802 (2.47) | 3.24                         | 0.83 (0.81 to 0.85) <sup>e)</sup> | 0.82 (0.80 to 0.84) <sup>e)</sup> |
| Yes                                        |               |                              |                                   |                                   |
| Unvaccinated                               | 8,429 (3.45)  | 2.10                         | 1.0 (reference)                   | 1.0 (reference)                   |
| Vaccinated                                 | 6,797 (2.69)  | 1.87                         | 0.80 (0.77 to 0.83) <sup>e)</sup> | 0.80 (0.77 to 0.82) <sup>e)</sup> |

Supplementary Table 9. Continued

| Chronic hepatitis                 | Events, n (%) | Incidence rate <sup>b)</sup> | aHR (95% CI)                      |                                   |
|-----------------------------------|---------------|------------------------------|-----------------------------------|-----------------------------------|
|                                   |               |                              | Model 1 <sup>c)</sup>             | Model 2 <sup>d)</sup>             |
| Medication use for diabetes       |               |                              |                                   |                                   |
| No                                |               |                              |                                   |                                   |
| Unvaccinated                      | 20,609 (3.25) | 5.13                         | 1.0 (reference)                   | 1.0 (reference)                   |
| Vaccinated                        | 15,926 (2.54) | 4.38                         | 0.82 (0.81 to 0.84) <sup>e)</sup> | 0.81 (0.80 to 0.83) <sup>e)</sup> |
| Yes                               |               |                              |                                   |                                   |
| Unvaccinated                      | 3,156 (3.49)  | 0.78                         | 1.0 (reference)                   | 1.0 (reference)                   |
| Vaccinated                        | 3,038 (2.72)  | 0.83                         | 0.81 (0.77 to 0.85) <sup>e)</sup> | 0.81 (0.77 to 0.85) <sup>e)</sup> |
| Medication use for hyperlipidemia |               |                              |                                   |                                   |
| No                                |               |                              |                                   |                                   |
| Unvaccinated                      | 20,084 (3.21) | 5.00                         | 1.0 (reference)                   | 1.0 (reference)                   |
| Vaccinated                        | 15,561 (2.51) | 4.28                         | 0.83 (0.81 to 0.84) <sup>e)</sup> | 0.82 (0.80 to 0.84) <sup>e)</sup> |
| Yes                               |               |                              |                                   |                                   |
| Unvaccinated                      | 3,681 (3.49)  | 0.92                         | 1.0 (reference)                   | 1.0 (reference)                   |
| Vaccinated                        | 3,038 (2.72)  | 0.83                         | 0.78 (0.75 to 0.82) <sup>e)</sup> | 0.78 (0.74 to 0.82) <sup>e)</sup> |

aHR, adjusted hazard ratio; CI, confidence interval.

<sup>a)</sup>Non-smoker indicates individuals who do not currently smoke.<sup>b)</sup>Incidence rate expressed as per 1,000 person-years.<sup>c)</sup>Models 1: adjusted for age (50–54, 55–59, 60–64, and ≥ 65 years) and sex.<sup>d)</sup>Model 2: adjusted for age (50–54, 55–59, 60–64, and ≥ 65 years); sex; household income (low income, middle income, and high income); region of residence (urban and rural); Charlson comorbidity index (0, 1, and ≥ 2); obesity (underweight [ $< 18.5 \text{ kg/m}^2$ ], normal [ $18.5\text{--}22.9 \text{ kg/m}^2$ ], overweight [ $23.0\text{--}24.9 \text{ kg/m}^2$ ], and obese [ $\geq 25.0 \text{ kg/m}^2$ ]); blood pressure (systolic blood pressure  $< 140 \text{ mmHg}$  and diastolic blood pressure  $< 90 \text{ mmHg}$  and systolic blood pressure  $\geq 140 \text{ mmHg}$  or diastolic blood pressure  $\geq 90 \text{ mmHg}$ ); fasting blood glucose ( $< 100$  and  $\geq 100 \text{ mg/dL}$ ); glomerular filtration rate ( $< 60$ ,  $60\text{--}89$ , and  $\geq 90 \text{ mL/min/1.73 m}^2$ ); smoking status (non-, ex-, and current smoker); alcohol consumption (drinks;  $< 1$ ,  $1\text{--}2$ ,  $3\text{--}4$ , and  $\geq 5$  days per week); aerobic physical activity (sufficient and insufficient); and history of medication use for coronary artery disease, diabetes mellitus, dyslipidemia, and hypertension.<sup>e)</sup>Significant differences ( $p < 0.05$ ).
